# Supplementary material for: FDTD Analysis of Hotspot-Enabling Hybrid Nanohole-Nanoparticle Structures for SERS Detection
Source: MDPI journal article supplement (doi:10.3390/bios12020128), 2022-02-17
Supplement: s1 [file s1]

Supporting information

# FDTD Analysis of Hotspot-Enabling Hybrid Nanohole-Nanoparticle Structures for SERS Detection

Juan Gomez-Cruz <sup>1</sup>, Yazan Bdour <sup>1</sup>, Kevin Stamplecoskie <sup>2</sup> and Carlos Escobedo <sup>1,\*</sup>

<sup>1</sup> Department of Chemical Engineering, Queen's University, 19 Division St, Kingston, ON K7L 3N6, Canada; j.gomezcruz@queensu.ca (J.G.C.); 16yb6@queensu.ca (Y.B.); ce32@queensu.ca (C.E.)

<sup>2</sup> Department of Chemistry, Queen's University, 90 Bader Lane, Kingston, Ontario, K7L 3N6, Canada; kevin.stamplecoskie@queensu.ca (K.S.)

\* Correspondence: ce32@queensu.ca; Tel.: +1-613-5333095

FDTD simulation to calculate the transmission spectrum and the electric field distribution were performed for the flow-through Ag-NHAs, Figure S1, and Au-NHAs, Figure S2. Both periodic NHA structures have a 200 nm hole diameter and 400 nm periodicity. The NHA structures are comprised of a 200 nm layer of silicon nitride ( $\text{Si}_3\text{N}_4$ ), a 5 nm adhesion layer of chrome (Cr), and a 100 nm layer of gold (Au-NHA) or silver (Ag-NHAs), respectively. Figure S1a shows the transmission spectra of the Ag-NHAs with the highest resonance peak situated at 660 nm. Figure S1b shows the e-field distribution of the Ag-NHAs plasmonic response under an excitation wavelength of 785 nm. The region with the highest e-field enhancement is located at the rim of the nanoholes, with a maximum calculated  $G_{\text{SERS}}$  of 721. Figure S2a shows the transmission spectra of the Au-NHAs with a resonance peak situated at 670 nm. Figure S2b shows the e-field distribution of the Au-NHAs plasmonic response under an excitation wavelength of 785 nm. The region with the highest e-field enhancement is also located at the rim of the nanoholes, with a maximum calculated  $G_{\text{SERS}}$  of 2087. The higher enhancement factor of the Au-NHAs is attributed to the proximity of the plasmonic resonance peak to the Raman excitation wavelength of 785 nm.

**Citation:** Gomez-Cruz, J.; Bdour, Y.; Stamplecoskie, K.; Escobedo, C.

FDTD analysis of hotspot-enabling hybrid nanohole-nanoparticle structures for SERS detection. *Biosensors*

2022, 12, 128. <https://doi.org/10.3390/bios12020128>

Received: 19 January 2022

Accepted: 14 February 2022

Published: 17 February 2022

**Publisher's Note:** MDPI stays neutral with regard to jurisdictional claims in published maps and institutional affiliations.

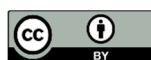

**Copyright:** © 2022 by the authors. Licensee MDPI, Basel, Switzerland. This article is an open access article distributed under the terms and conditions of the Creative Commons Attribution (CC BY) license (<https://creativecommons.org/licenses/by/4.0/>).

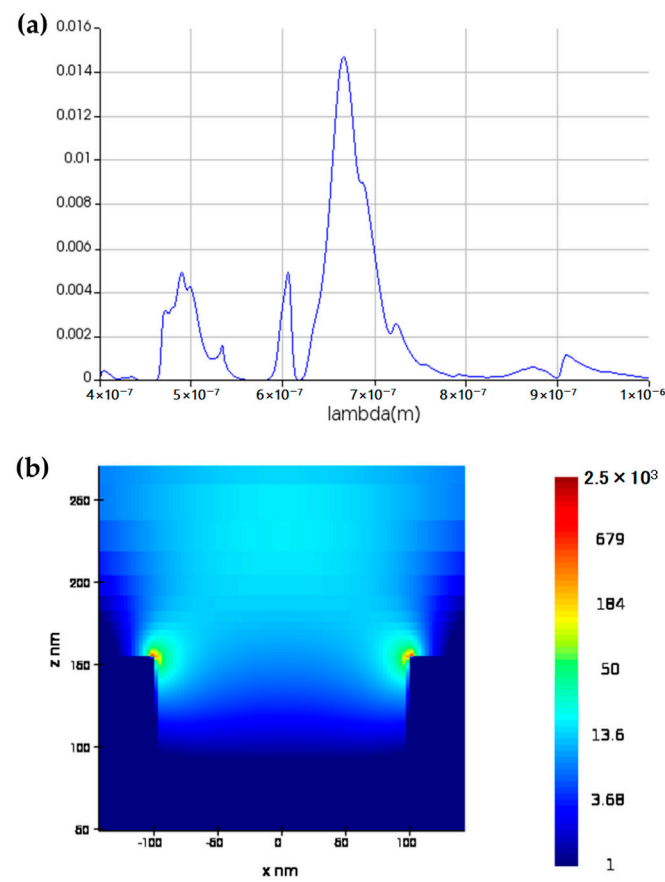

**Figure S1.** Silver NHA FDTD simulations show the (a) transmission spectrum and the (b) Electric field distribution ( $|E/E_0|^4$ ) of the electromagnetic Raman enhancement factor.  $\times 10^{-7}$

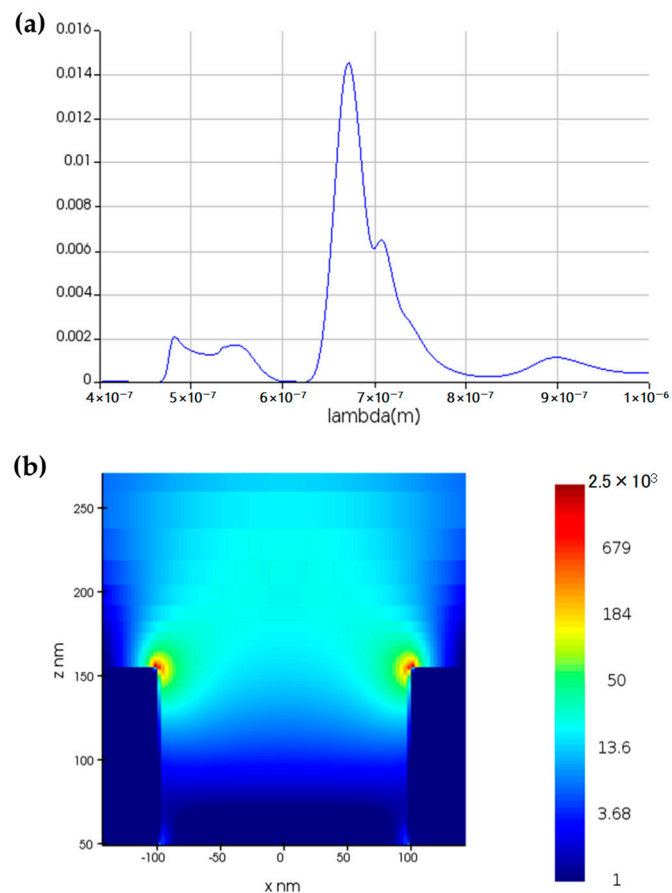

**Figure S2.** Gold NHA FDTD simulations show the (a) transmission spectrum and the (b) Electric field distribution ( $|E/E_0|^4$ ) of the electromagnetic Raman enhancement factor.
